# Supplementary material for: A method yielding comparable estimates of the fraternal birth order and female fecundity effects in male homosexuality
Source: PubMed Central journal article supplement (PMC7126035; doi:10.1098/rspb.2019.2907), 2020-03-18
Supplement: rspb20192907supp1.pdf [file rspb20192907supp1.pdf]

## Supplementary Material

Ray Blanchard, Jurian Krupp, Doug P. VanderLaan, Paul L. Vasey, and Kenneth J. Zucker.

A Method Yielding Comparable Estimates of the Fraternal Birth Order and Female Fecundity Effects in Male Homosexuality.

Proceedings of the Royal Society B. doi: 10.1098/rspb.2019.2907

1. Means and standard deviations of computed variables

2. Correlations between computed variables

### Descriptive Statistics

|                                   | Mean    | Std. Deviation | N  |
|-----------------------------------|---------|----------------|----|
| Percent Loss                      | 31.9815 | 18.37927       | 14 |
| Proportion of Homosexual Subjects | .3630   | .20478         | 14 |
| Proportion of Only Children       | .4867   | .10227         | 14 |
| FBOE                              | 1.5190  | .91556         | 14 |
| FFE                               | 1.0820  | .47056         | 14 |
| Odds <sub>11</sub>                | .7519   | .62767         | 14 |
| Odds <sub>12</sub>                | .6689   | .56507         | 14 |
| Odds <sub>22</sub>                | .9190   | .69640         | 14 |

### Correlations

|                                      |                     | Percent Loss | Proportion of<br>Homosexual<br>Subjects | Proportion of Only<br>Children | FBOE  | FFE   | Odds <sub>11</sub> | Odds <sub>12</sub> | Odds <sub>22</sub> |
|--------------------------------------|---------------------|--------------|-----------------------------------------|--------------------------------|-------|-------|--------------------|--------------------|--------------------|
| Percent Loss                         | Pearson Correlation | 1            | -.154                                   | -.849**                        | .105  | -.518 | .038               | -.348              | -.285              |
|                                      | Sig. (2-tailed)     |              | .599                                    | .000                           | .721  | .058  | .898               | .223               | .323               |
|                                      | N                   | 14           | 14                                      | 14                             | 14    | 14    | 14                 | 14                 | 14                 |
| Proportion of Homosexual<br>Subjects | Pearson Correlation | -.154        | 1                                       | .193                           | .052  | -.459 | .933**             | .888**             | .923**             |
|                                      | Sig. (2-tailed)     | .599         |                                         | .509                           | .859  | .099  | .000               | .000               | .000               |
|                                      | N                   | 14           | 14                                      | 14                             | 14    | 14    | 14                 | 14                 | 14                 |
| Proportion of Only Children          | Pearson Correlation | -.849**      | .193                                    | 1                              | -.153 | .430  | .023               | .347               | .244               |
|                                      | Sig. (2-tailed)     | .000         | .509                                    |                                | .600  | .125  | .938               | .224               | .400               |
|                                      | N                   | 14           | 14                                      | 14                             | 14    | 14    | 14                 | 14                 | 14                 |
| FBOE                                 | Pearson Correlation | .105         | .052                                    | -.153                          | 1     | -.445 | -.039              | -.202              | .236               |
|                                      | Sig. (2-tailed)     | .721         | .859                                    | .600                           |       | .110  | .894               | .489               | .416               |
|                                      | N                   | 14           | 14                                      | 14                             | 14    | 14    | 14                 | 14                 | 14                 |
| FFE                                  | Pearson Correlation | -.518        | -.459                                   | .430                           | -.445 | 1     | -.528              | -.099              | -.344              |
|                                      | Sig. (2-tailed)     | .058         | .099                                    | .125                           | .110  |       | .053               | .737               | .229               |
|                                      | N                   | 14           | 14                                      | 14                             | 14    | 14    | 14                 | 14                 | 14                 |
| Odds <sub>11</sub>                   | Pearson Correlation | .038         | .933**                                  | .023                           | -.039 | -.528 | 1                  | .799**             | .819**             |
|                                      | Sig. (2-tailed)     | .898         | .000                                    | .938                           | .894  | .053  |                    | .001               | .000               |
|                                      | N                   | 14           | 14                                      | 14                             | 14    | 14    | 14                 | 14                 | 14                 |
| Odds <sub>12</sub>                   | Pearson Correlation | -.348        | .888**                                  | .347                           | -.202 | -.099 | .799**             | 1                  | .880**             |
|                                      | Sig. (2-tailed)     | .223         | .000                                    | .224                           | .489  | .737  | .001               |                    | .000               |
|                                      | N                   | 14           | 14                                      | 14                             | 14    | 14    | 14                 | 14                 | 14                 |
| Odds <sub>22</sub>                   | Pearson Correlation | -.285        | .923**                                  | .244                           | .236  | -.344 | .819**             | .880**             | 1                  |
|                                      | Sig. (2-tailed)     | .323         | .000                                    | .400                           | .416  | .229  | .000               | .000               |                    |
|                                      | N                   | 14           | 14                                      | 14                             | 14    | 14    | 14                 | 14                 | 14                 |

\*\* . Correlation is significant at the 0.01 level (2-tailed).
